# Supplementary material
Source: Springer Nature journal article supplement (https://www.springermedizin.de/resource/supplementary/13690_2014_5060_MOESM2_ESM.pdf/9685646)

Nb  
cured/Nb  
treated  
with F-Up

Study

ID

Proportion (95% CI)

North America

Javaheri (1981)

0.96 (0.87, 1.04)

22/23

Subtotal (I-squared = .%, p = .)

0.96 (0.87, 1.04)

Europe

Hussein & Galloway (1985)

0.91 (0.74, 1.08)

10/11

de Cristofaro (1990)

1.00 (0.96, 1.04)

42/42

Rogstad (1992)

0.80 (0.62, 0.98)

16/20

Loobuyck & Duncan (1993)

0.97 (0.95, 0.99)

445/459

Subtotal (I-squared = 51.6%, p = 0.102)

0.97 (0.93, 1.01)

Asia

Singh (1998)

0.88 (0.79, 0.98)

38/43

Joshi (2013)

0.91 (0.79, 1.03)

20/22

Subtotal (I-squared = 0.0%, p = 0.746)

0.89 (0.82, 0.97)

Overall (I-squared = 42.5%, p = 0.107)

0.96 (0.92, 0.99)

NOTE: Weights are from random effects analysis

.5 .6 .7 .8 .9 1 1.1 1.2

Proportion

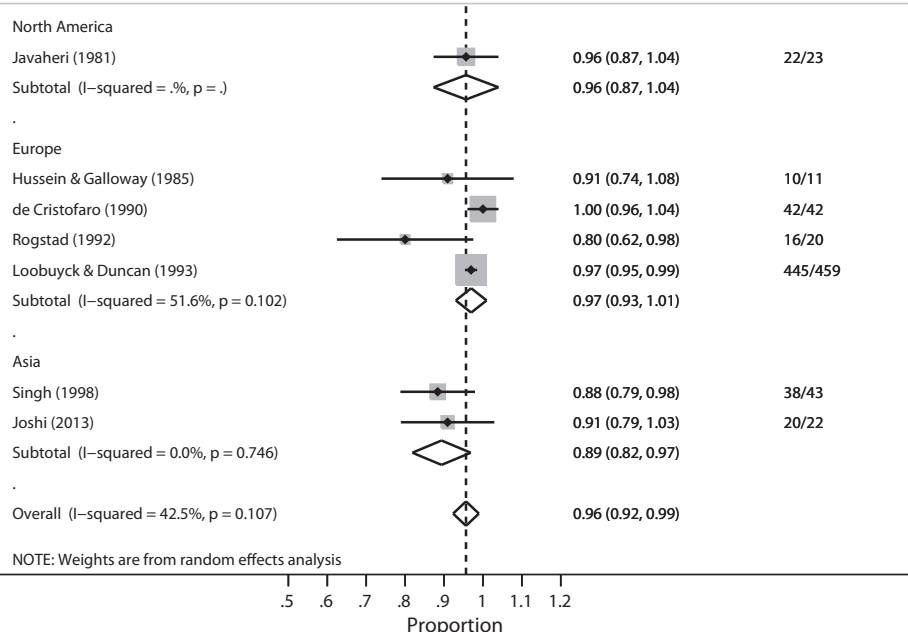

Supplement: MOESM2 [file 9685646]
